# Supplementary material
Source: PubMed Central journal article supplement (PMC9308743)

# Full unedited gels for

**Figure 2A**

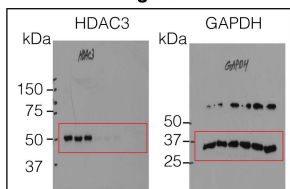

**Figure 2E**

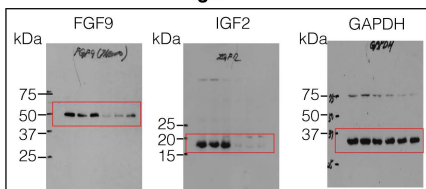

**Figure 3A**

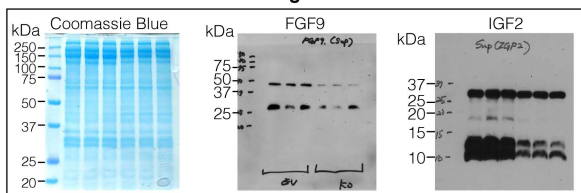

**Figure 4B**

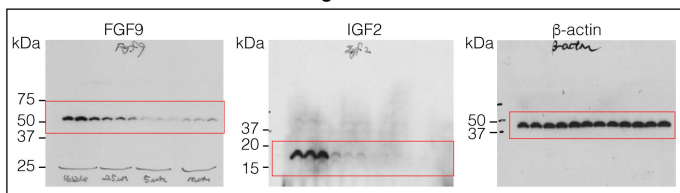

**Figure 4C**

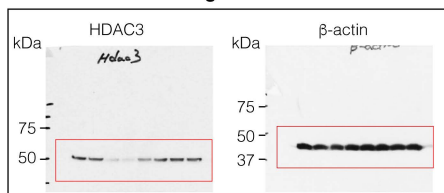

**Figure 5D (Left)**

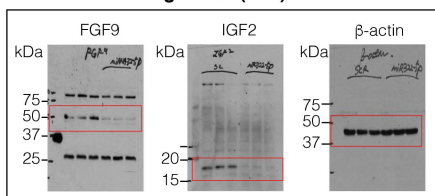

**Figure 5D (Right)**

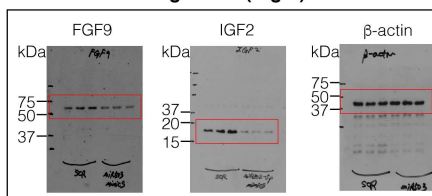

**Figure 6B**

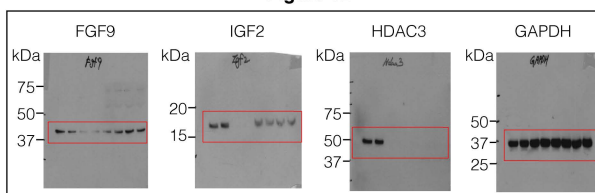

**Figure 7A**

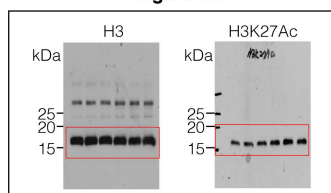

**Supplemental Figure 6**

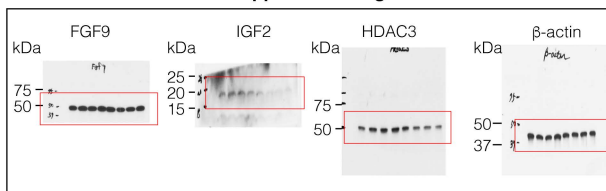

**Supplemental Figure 7A**

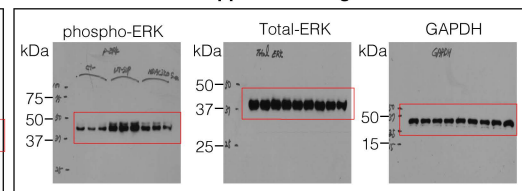

**Supplemental Figure 7B (Left)**

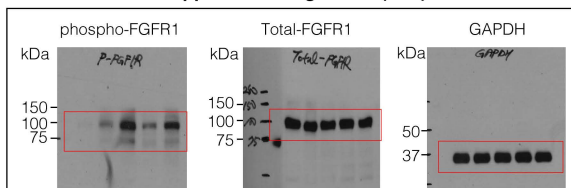

**Supplemental Figure 7B (Right)**

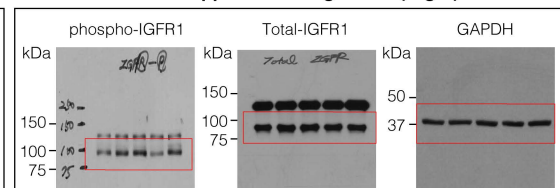

Supplement: NIHMS1813822-supplement-320785_Uncut_Gel_Blots.pdf [file NIHMS1813822-supplement-320785_Uncut_Gel_Blots.pdf]
