# Supplementary material
Source: PubMed Central journal article supplement (PMC9308743)
Supplement: NIHMS1813822-supplement-Major_resources_Table.pdf [file NIHMS1813822-supplement-Major_resources_Table.pdf]

## Major Resources Table

### Animals (in vivo studies)

| Species                        | Vendor or Source       | Background Strain | Sex    | Persistent ID / URL |
|--------------------------------|------------------------|-------------------|--------|---------------------|
| <i>Hdac3<sup>fllox/+</sup></i> | Jackson Laboratory     | C57BL/6J          | either | Stock #006148       |
| <i>Tnnt2<sup>nGFP/+</sup></i>  | Dr. Chenleng Cai's lab | C57BL/6J          | either |                     |
| <i>R26<sup>eYFP</sup></i>      | Jackson Laboratory     | C57BL/6J          | either | Stock #006148       |
| <i>Wt1<sup>CreERT2/+</sup></i> | Jackson Laboratory     | C57BL/6J          | either | Stock #010912       |

### Genetically Modified Animals

|                 | Species | Vendor or Source | Background Strain | Other Information | Persistent ID / URL |
|-----------------|---------|------------------|-------------------|-------------------|---------------------|
| Parent - Male   |         |                  |                   |                   |                     |
| Parent - Female |         |                  |                   |                   |                     |

### Antibodies

| Target antigen                      | Vendor or Source | Catalog #  | Working concentration                    | Lot # (preferred but not required) | Persistent ID / URL                                                                                                                                                                                                                                                                                                                                                                                         |
|-------------------------------------|------------------|------------|------------------------------------------|------------------------------------|-------------------------------------------------------------------------------------------------------------------------------------------------------------------------------------------------------------------------------------------------------------------------------------------------------------------------------------------------------------------------------------------------------------|
| <b>BrdU</b>                         | eBioscience      | 14-5071-80 | IHC-1:50<br>(10 ug/mL)                   | 4279854                            | <a href="https://www.thermofisher.com/antibody/product/BrdU-Antibody-clone-BU20A-Monoclonal/14-5071-37">https://www.thermofisher.com/antibody/product/BrdU-Antibody-clone-BU20A-Monoclonal/14-5071-37</a>                                                                                                                                                                                                   |
| <b>p-H3</b>                         | Cell Signaling   | 9701S      | IHC-1:20<br>ICC-1:100<br>(1 ug/mL)       | 16                                 | <a href="https://www.cellsignal.com/products/primary-antibodies/phospho-histone-h3-ser10-antibody/9701?site-search-type=Products&amp;N=4294956287&amp;Ntt=9701s&amp;fromPage=plp&amp;_requestid=2130723">https://www.cellsignal.com/products/primary-antibodies/phospho-histone-h3-ser10-antibody/9701?site-search-type=Products&amp;N=4294956287&amp;Ntt=9701s&amp;fromPage=plp&amp;_requestid=2130723</a> |
| <b>ACTC1</b>                        | ARP              | 03-61075   | IHC-1:200<br>ICC-1:100<br>(0.0625 ug/mL) | 151251A                            | <a href="https://www.arp1.com/anti-cardiac-actin-fetal-a-actin-monoclonal-antibody-03-61075.html">https://www.arp1.com/anti-cardiac-actin-fetal-a-actin-monoclonal-antibody-03-61075.html</a>                                                                                                                                                                                                               |
| <b>ACTC1</b>                        | Abcam            | Ab46805    | IHC-1:200<br>(1.42 ug/mL)                | GR197549-3                         | <a href="https://www.abcam.com/muscle-actin-antibody-ep184e-ab46805.html">https://www.abcam.com/muscle-actin-antibody-ep184e-ab46805.html</a>                                                                                                                                                                                                                                                               |
| <b>WT1</b>                          | Santa Cruz       | sc-7385    | IHC-1:50<br>(4 ug/mL)                    | E2813                              | <a href="https://datasheets.scbt.com/sc-7385.pdf">https://datasheets.scbt.com/sc-7385.pdf</a>                                                                                                                                                                                                                                                                                                               |
| <b>GFP</b>                          | Abcam            | ab6673     | IHC-1:200<br>(2.5 ug/mL)                 | GR202861-3                         | <a href="https://www.abcam.com/gfp-antibody-ab6673.html">https://www.abcam.com/gfp-antibody-ab6673.html</a>                                                                                                                                                                                                                                                                                                 |
| <b>HDAC3</b>                        | Abcam            | ab7030     | WB-1:1000<br>IP-5 ug                     | GR166225-11                        | <a href="https://www.abcam.com/hdac3-antibody-ab7030.html">https://www.abcam.com/hdac3-antibody-ab7030.html</a>                                                                                                                                                                                                                                                                                             |
| <b>HDAC3</b>                        | Santa Cruz       | sc-11417   | IHC-1:50                                 | D2611                              | <a href="https://www.scbt.com/p/hdac3-antibody-h-99">https://www.scbt.com/p/hdac3-antibody-h-99</a>                                                                                                                                                                                                                                                                                                         |
| <b>Rabbit IgG – Isotype control</b> | Abcam            | ab37415    | IP-5 ug                                  | GR3257876-1                        | <a href="https://www.abcam.com/rabbit-igg-polyclonal-isotype-control-ab37415.html">https://www.abcam.com/rabbit-igg-polyclonal-isotype-control-ab37415.html</a>                                                                                                                                                                                                                                             |
| <b>CD31</b>                         | Dianova          | Dia-310    | IHC-1:200                                |                                    | <a href="https://www.arp1.com/anti-cd31-monoclonal-antibody-dia-310.html">https://www.arp1.com/anti-cd31-monoclonal-antibody-dia-310.html</a>                                                                                                                                                                                                                                                               |
| <b>smMHC1<br/>1</b>                 | Abcam            | Ab683      | IHC-1:50<br>(20 ug/mL)                   | GR49754-6                          | <a href="https://www.abcam.com/smooth-muscle-myosin-heavy-chain-11-antibody-1g12-ab683.html">https://www.abcam.com/smooth-muscle-myosin-heavy-chain-11-antibody-1g12-ab683.html</a>                                                                                                                                                                                                                         |
| <b>Vimentin</b>                     | Cell Signaling   | 5741       | IHC-1:200<br>(0.225 ug/mL)               | 6                                  | <a href="https://www.cellsignal.com/products/primary-antibodies/vimentin-d21h3-xp-rabbit-mab/5741">https://www.cellsignal.com/products/primary-antibodies/vimentin-d21h3-xp-rabbit-mab/5741</a>                                                                                                                                                                                                             |
| <b>IGF2</b>                         | Thermo Fisher    | PA5-47946  | IHC-1:25<br>WB-1:1000<br>(20 ug/mL)      | VI3076963A                         | <a href="https://www.cellsignal.com/products/primary-antibodies/phospho-histone-h3-ser10-antibody/9701?site-search-type=Products&amp;N=4294956287&amp;Ntt=97">https://www.cellsignal.com/products/primary-antibodies/phospho-histone-h3-ser10-antibody/9701?site-search-type=Products&amp;N=4294956287&amp;Ntt=97</a>                                                                                       |

|                             |                |            |                        |             |                                                                                                                                                                                                                                                                                                                                                                                                       |
|-----------------------------|----------------|------------|------------------------|-------------|-------------------------------------------------------------------------------------------------------------------------------------------------------------------------------------------------------------------------------------------------------------------------------------------------------------------------------------------------------------------------------------------------------|
|                             |                |            |                        |             | 01s&fromPage=plp&_requestid=2130723                                                                                                                                                                                                                                                                                                                                                                   |
| <b>FGF9</b>                 | Abcam          | ab206408   | WB-1:10s0              | GR284805-2  | <a href="https://www.abcam.com/fgf9gaf-antibody-epr19937-ab206408.html">https://www.abcam.com/fgf9gaf-antibody-epr19937-ab206408.html</a>                                                                                                                                                                                                                                                             |
| <b>FGF9</b>                 | Santa Cruz     | sc-8413    | IHC-1:20<br>(10 ug/mL) | K0419       | <a href="https://datasheets.scbt.com/sc-8413.pdf">https://datasheets.scbt.com/sc-8413.pdf</a>                                                                                                                                                                                                                                                                                                         |
| <b>FGFR1</b>                | Cell Signaling | 9740S      | WB-1:1000              | 4           | <a href="https://www.cellsignal.com/products/primary-antibodies/phospho-fgf-receptor-1-tyr653-654-d4x3d-rabbit-mab/52928">https://www.cellsignal.com/products/primary-antibodies/phospho-fgf-receptor-1-tyr653-654-d4x3d-rabbit-mab/52928</a>                                                                                                                                                         |
| <b>p-FGFR1 (Tyr653/654)</b> | Cell Signaling | 52598S     | WB-1:1000              | 2           | <a href="https://www.cellsignal.com/products/primary-antibodies/phospho-fgf-receptor-1-tyr653-654-d4x3d-rabbit-mab/52928?site-search-type=Products&amp;N=4294956287&amp;Ntt=p-fgfr1&amp;fromPage=plp">https://www.cellsignal.com/products/primary-antibodies/phospho-fgf-receptor-1-tyr653-654-d4x3d-rabbit-mab/52928?site-search-type=Products&amp;N=4294956287&amp;Ntt=p-fgfr1&amp;fromPage=plp</a> |
| <b>IGFR1</b>                | Cell Signaling | 3027S      | WB-1:1000              | 16          | <a href="https://www.cellsignal.com/products/primary-antibodies/igf-i-receptor-b-antibody/3027">https://www.cellsignal.com/products/primary-antibodies/igf-i-receptor-b-antibody/3027</a>                                                                                                                                                                                                             |
| <b>p-IGFR1</b>              | Sigma          | SAB4300069 | WB-1:1000              | 511711088   | <a href="https://www.sigmaaldrich.com/US/en/product/sigma/sab4300069">https://www.sigmaaldrich.com/US/en/product/sigma/sab4300069</a>                                                                                                                                                                                                                                                                 |
| <b>ERK</b>                  | BD Biosciences | 610123     | WB-1:1000              |             | <a href="https://wwwbdbiosciences.com/en-us/products/reagents/microscopy-imaging-reagents/immunofluorescence-reagents/purified-mouse-anti-erk-pan-erk.610123">https://wwwbdbiosciences.com/en-us/products/reagents/microscopy-imaging-reagents/immunofluorescence-reagents/purified-mouse-anti-erk-pan-erk.610123</a>                                                                                 |
| <b>p-ERK</b>                | Cell Signaling | 9101       | WB-1:1000              | 30          | <a href="https://www.cellsignal.com/products/primary-antibodies/phospho-p44-42-mapk-erk1-2-thr202-tyr204-antibody/9101">https://www.cellsignal.com/products/primary-antibodies/phospho-p44-42-mapk-erk1-2-thr202-tyr204-antibody/9101</a>                                                                                                                                                             |
| <b>H3K27Ac</b>              | Abcam          | ab4729     | WB-1:1000<br>IP-5 ug   | GR3303559-1 | <a href="https://www.abcam.com/histone-h3-acetyl-k27-antibody-chip-grade-ab4729.html">https://www.abcam.com/histone-h3-acetyl-k27-antibody-chip-grade-ab4729.html</a>                                                                                                                                                                                                                                 |
| <b>H3</b>                   | Abcam          | ab176842   | WB-1:5000              | GR3237728-1 | <a href="https://www.abcam.com/histone-h3-antibody-epr16987-nuclear-marker-and-chip-grade-ab176842.html">https://www.abcam.com/histone-h3-antibody-epr16987-nuclear-marker-and-chip-grade-ab176842.html</a>                                                                                                                                                                                           |
| <b>SOX17</b>                | R&D            | AF1924     | IHC-1:100<br>(5 ug/mL) | KGA1021032  | <a href="https://www.rndsystems.com/products/human-sox17-antibody_af1924">https://www.rndsystems.com/products/human-sox17-antibody_af1924</a>                                                                                                                                                                                                                                                         |
| <b>β-actin</b>              | Proteintech    | HRP-60008  | WB-1:10,000            |             | <a href="https://www.ptglab.com/products/ACTB-Antibody-HRP-60008.htm">https://www.ptglab.com/products/ACTB-Antibody-HRP-60008.htm</a>                                                                                                                                                                                                                                                                 |
| <b>GAPDH</b>                | Proteintech    | HRP-60004  | WB-1:10,000            |             | <a href="https://www.ptglab.com/products/GAPDH-Antibody-HRP-60004.htm">https://www.ptglab.com/products/GAPDH-Antibody-HRP-60004.htm</a>                                                                                                                                                                                                                                                               |

### DNA/cDNA Clones

| Clone Name                                   | Sequence | Source / Repository | Persistent ID / URL |
|----------------------------------------------|----------|---------------------|---------------------|
| lentiCRISPR v2 vector                        |          | Addgene             | #52961              |
| PsPAX2                                       |          | Addgene             | #12260              |
| PMD2G                                        |          | Addgene             | #12259              |
| mCherry pCDH                                 |          | Li lab              |                     |
| Hdac3 WT-pCDH                                |          | Li lab              |                     |
| Hdac3 Y298H-pCDH                             |          | Li lab              |                     |
| miRZIP-424(322) anti-microRNA construct      |          | System Biosciences  | #MZIP424-PA-1       |
| miRZIP-503 anti-microRNA construct           |          | System Biosciences  | #MZIP503-PA-1       |
| Empty pGL4.10 TK-Renilla                     |          | Promega             |                     |
| 1.5kb miR322/503 promoter pGL4.10 TK-Renilla |          | Li lab              |                     |

## Cultured Cells

| Name                                    | Vendor or Source | Sex (F, M, or unknown) | Persistent ID / URL |
|-----------------------------------------|------------------|------------------------|---------------------|
| Mouse embryonic epicardial cells (MECs) | Millipore        | unknown                | #SCC187             |
| Lenti-XTM 293T cells                    | Takara Bio USA   | unknown                | #632180             |

## Data & Code Availability

| Description                    | Source / Repository | Persistent ID / URL                                                                                                                     |
|--------------------------------|---------------------|-----------------------------------------------------------------------------------------------------------------------------------------|
| RNA sequencing data            | NCBI GEO            | <a href="https://www.ncbi.nlm.nih.gov/geo/query/acc.cgi?acc=GSE197297">https://www.ncbi.nlm.nih.gov/geo/query/acc.cgi?acc=GSE197297</a> |
| Non-coding RNA sequencing data | NCBI GEO            | <a href="https://www.ncbi.nlm.nih.gov/geo/query/acc.cgi?acc=GSE197296">https://www.ncbi.nlm.nih.gov/geo/query/acc.cgi?acc=GSE197296</a> |

## qRT-PCR primers

|               | Forward                  | Reverse                |
|---------------|--------------------------|------------------------|
| <i>Fgf9</i>   | GGGGAGCTGTATGGATCAGA     | TCCCGTCCTTATTTAATGCAA  |
| <i>Igf2</i>   | CGCTTCAGTTTGTCTGTTTCG    | GCAGCACTCTTCCACGATG    |
| <i>Snail2</i> | CATTGCCTTGTGTCTGCAAG     | CAGTGAGGGCAAGAGAAAGG   |
| <i>Twist1</i> | AGCTACGCCTTCTCCGTCT      | TCCTTCTCTGGAAACAATGACA |
| <i>Gapdh</i>  | TCCTGGTATGACAATGAATACGGC | TCTTGCTCAGTGTCTTGTCTGG |

## ChIP qRT-PCR primers

|                        | Forward     | Reverse               |
|------------------------|-------------|-----------------------|
| miRNA 322/503 promoter | Primer 1    | GGATGGTTTTTGTGCTTTCC  |
|                        | Primer 2    | CAACTTAAGGAGTGGGGCTGT |
|                        | Primer 3    | GCATGGCATCTGCAACATTA  |
|                        | Gene Desert | CAGCATGAAAATGGAGGTCA  |
|                        |             | TAAGCCACGCCA CTGAAAAT |
|                        |             | CAATGAATGCTGGGTCCTTT  |
|                        |             | CTCACTCCCTGGGTTTGTGT  |
|                        |             | TGAGGGTAAAGGTGCTTGT   |

## Other

| Description                                | Source / Repository       | Persistent ID / URL |
|--------------------------------------------|---------------------------|---------------------|
| Tamoxifen                                  | Sigma                     | #T5648              |
| 5-Bromo-2'deoxyuridine                     | Sigma                     | #59-14-3            |
| RGFP966                                    | Sigma                     | #1396841-57-8       |
| Dual-Luciferase® Reporter Assay System     | Promega                   | #E1910              |
| Lipofectamine 2000                         | Thermo Fischer Scientific | #11668019           |
| Lipofectamine™ RNAiMAX                     | Thermo Fischer Scientific | #13778150           |
| TaqMan™ MicroRNA Reverse Transcription Kit | Thermo Fischer Scientific | #4366596            |
